# Supplementary material for: Maternal Genetic Composition of a Medieval Population from a Hungarian-Slavic Contact Zone in Central Europe
Source: PLoS One. 2016 Mar 10;11(3):e0151206. doi: 10.1371/journal.pone.0151206 (PMC4786151; doi:10.1371/journal.pone.0151206)
Supplement: S7 Table — Population information and mtDNA haplogroup frequencies used for PCA with 12 medieval populations (11 from Europe and one from Asia). (XLSX) [file pone.0151206.s010.xlsx]

## Sheet: S7
S7 Table. Population information and mtDNA haplogroup frequencies used for PCA with 12 medieval popualtions (11 from Europe and one from Asia)
region	country	population	Abbreviation	N	Mitochondrial haplogoups																											References
						A	B	C/G/F	D	H	HV	HV0	I	J	JT	K	M	N	R/R0	T	T1	T2	U	U4	U5a	U5b	U8	V	W	X
Europe, east	Slovakia	medieval Slavs from Slovakia: Nitra-Sindolka, Csekej, Lébény	SVK-medieval	20	SVK-medieval	0	0	0	0	25	0	0	0	20	0	0	0	0	5	0	15	15	0	5	5	0	10	0	0	0	This study (19); Tömöry et al. 2007 (1)
Europe, north	Norvay	Vikings from Norvay: Nord-Trøndelag, Nordland, Sør-Trøndelag, Telemark, Troms, Oppland, Hedmark	NOR-Vikings	56	NOR-Vikings	1.78571	0	0	0	39.2857	3.57143	3.57143	3.57143	17.8571	0	7.14286	0	0	0	0	0	3.57143	1.78571	1.78571	7.14286	7.14286	0	1.78571	0	0	Krzewińska et al. 2015 (56)
Europe, east	Poland	medieval Slavs from Poland: Cedynia (West Pomerania Province), Ostrów Lednicki (Greater Poland Province)	POL-medieval	20	POL-medieval	0	0	0	0	40	5	5	0	10	0	10	0	5	5	0	5	0	0	0	0	0	0	0	5	10	Juras et al. 2014 (20)
Europe, south	Italy - Piedmont	Lombards from Italy: Rivoli, Corso Levi (Turin); Rivoli, La Perosa (Turin); Mombello Monferrato (Alessandria); Collegno (Turin); Centallo, San Gervasio (Cuneo)	ITA-Lombards	28	ITA-Lombards	0	0	0	0	50	0	0	3.57143	17.8571	0	0	0	0	0	3.57143	0	7.14286	3.57143	3.57143	10.7143	0	0	0	0	0	Vai et al. 2015 (28)
Europe, south	Italy - Tuscans	medieval Italians: Firenze, Piazza Signoria; Pisa, Vicopisano; Livorno, Castello Donoratico; Massa Carrara, Fivizzano; Siena, Santa Maria della Scala; Grosseto, San Quirico	ITA-medieval	27	ITA-medieval	0	0	0	3.7037	66.6667	0	0	0	3.7037	0	3.7037	3.7037	0	0	0	0	14.8148	3.7037	0	0	0	0	0	0	0	Guimaraes et al. 2009 (28)
Europe, south	Spain	medieval Spaniards: Basque, Aldaieta	SPA-medieval	56	SPA-medieval	0	0	0	0	60.7143	0	1.78571	0	14.2857	0	1.78571	3.57143	0	0	1.78571	0	3.57143	12.5	0	0	0	0	0	0	0	Alzualde et al. 2006 (56)
Europe, east	Hungary	Lombards from Hungary: Szólád	HUN-Lombards	28	HUN-Lombards	0	0	0	0	32.1429	7.14286	0	7.14286	14.2857	0	7.14286	0	10.7143	0	0	0	7.14286	3.57143	10.7143	0	0	0	0	0	0	Alt et al. 2014 (28)
Europe, north	Denmark	medieval Danes and Vikings: Galgedil, Kongemarken, Riisby	DAN-Vikings, medieval	29	DAN-Vikings, medieval	0	0	0	0	34.4828	0	0	13.7931	13.7931	0	6.89655	0	3.44828	0	3.44828	0	6.89655	3.44828	0	6.89655	3.44828	0	0	0	3.44828	Melchior et al. 2010 (29)
Asia, central	Mongolia	Xiongnu period: Hsiung-nu	MON-Xiongnu	46	MON-Xiongnu	17.3913	2.17391	21.7391	43.4783	0	0	0	0	2.17391	0	0	4.34783	0	0	0	0	0	4.34783	0	4.34783	0	0	0	0	0	Keyser-Tracqui (2003) 43; Kim et al. 2010 (3)
Europe, east	Hungary	medieval Hungarians	HUN-medieval	26	HUN-medieval	0	3.84615	0	0	19.2308	3.84615	0	3.84615	0	0	0	3.84615	11.5385	7.69231	0	0	15.3846	7.69231	7.69231	3.84615	0	0	3.84615	0	7.69231	Tömöry et al. 2007 (26)
Europe, east	Hungary	medieval Cumanians	HUN-Cumanians	11	HUN-Cumanians	0	0	0	9.09091	36.3636	0	0	0	0	9.09091	0	0	0	0	0	0	0	27.2727	0	0	0	0	18.1818	0	0	Bogácsi-Szabó et al. 2005 (11)
Europe, north	Iceland	early medieval Icelander	ICE-medieval	73	ICE-medieval	0	0	0	0	32.8767	1.36986	0	6.84932	15.0685	0	13.6986	0	0	0	2.73973	0	6.84932	1.36986	4.10959	4.10959	4.10959	0	2.73973	2.73973	1.36986	Helgason et al. 2009 (73)
